# Supplementary material for: Oral Supplementation of the Vitamin D Metabolite 25(OH)D3 Against Influenza Virus Infection in Mice
Source: PubMed Central journal article supplement (PMC7400405; doi:10.3390/nu12072000), 2020-07-05
Supplement: nutrients-12-02000-s001.pdf [file nutrients-12-02000-s001.pdf]

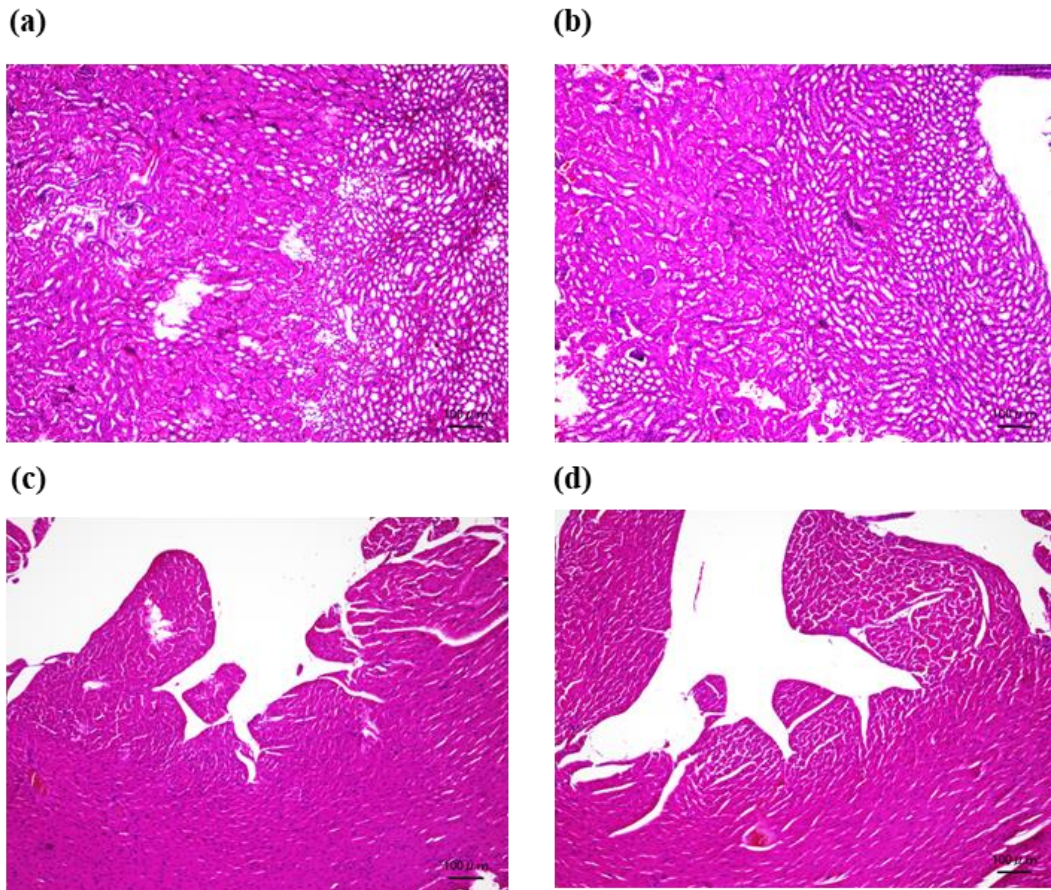

**Figure S1.** Histopathological findings in mouse kidneys and hearts. Mice were fed for 7 weeks, and kidneys and hearts were sectioned and stained with hematoxylin and eosin. The kidneys of a standard-fed mouse (a) and a 25(OH)D<sub>3</sub>-fed mouse (b). The hearts of a standard-fed mouse (c) and a 25(OH)D<sub>3</sub>-fed mouse (d).
